# Supplementary material
Source: publisher site journal article supplement (https://www.degruyterbrill.com/publication/isbn/9783110438055/downloadAsset/9783110438055_Zusatzmaterial.zip)
Supplement: Supplementary file 1 [file Liste der MapleSim-Modelle.docx]

**Liste der MapleSim–Modelle**

| Beispiel 2-17 | Ebenes Getriebe einer Viergelenkkette |
| --- | --- |
| Beispiel 3-19 | Schwingender Stab |
| Beispiel 4-1 | Gleitende Masse auf einer festen Unterlage |
| Beispiel 4-5 | Fallschirmsprung |
| Beispiel 6-1 | Das physische Doppelpendel in der Ebene |
| Beispiel 7-1 | Schwingungsversuch am Kelvin-Modell |
| Beispiel 7-2_1 | Freie gedämpfte Schwingungen eines Einmassenschwingers (starke Dämpfung D >1) |
| Beispiel 7-2_2 | Freie gedämpfte Schwingungen eines Einmassenschwingers (Grenzfall D = 1) |
| Beispiel 7-2_3 | Freie gedämpfte Schwingungen eines Einmassenschwingers (schwache Dämpfung D < 1) |
| Beispiel 7-3_1 | Erregung eines gedämpften Einmassenschwingers durch eine Sprungfunktion (D > 1) |
| Beispiel 7-3_2 | Erregung eines gedämpften Einmassenschwingers durch eine Sprungfunktion (D = 1) |
| Beispiel 7-3_3 | Erregung eines gedämpften Einmassenschwingers durch eine Sprungfunktion (D < 1) |
| Beispiel 7-4 | Erregung eines gedämpften Einmassenschwingers durch einen Rechteckstoß (D < 1) |
| Beispiel 7-5 | Freie ungedämpfte Schwingungen mit 2 Freiheitsgraden |
| Beispiel 7-7 | Freie gedämpfte Schwingungen mit 2 Freiheitsgraden |
| Beispiel 7-8 | Erzwungene ungedämpfte Schwingungen mit 2 Freiheitsgraden |
