# Supplementary material
Source: publisher site journal article supplement (https://www.degruyterbrill.com/publication/isbn/9783110438055/downloadAsset/9783110438055_Zusatzmaterial.zip)
Supplement: Supplementary file 3 [file Liste der Beispiele und Maple-Arbeitsbltter.docx]

**Liste der Beispiele und Maple-Arbeitsblätter**

| **Beispiel** | **Arbeitsblatt** | **Prozedur** | **Aufgabe** |
| --- | --- | --- | --- |
| Beispiel 1-1 | kapitel_01_a | - | Berechnung der Bogenlänge einer ebenen Kurve |
| Beispiel 1-2 | kapitel_01_b | Proc_Calc_01 | Berechnung von Geschwindigkeit und Beschleunigung in natürlichen Koordinaten |
| Beispiel 1-3 | kapitel_01_b | - | - |
| Beispiel 1-4 | kapitel_01_b | - | - |
| Beispiel 1-5 | - | - | - |
| Beispiel 2-1 | - | - | Berechnung der Komponenten eines Versors bei Drehung des Koordinatensystems um die 3-Achse |
| Beispiel 2-2 | kapitel_02_a | Proc_Calc_02  (save) | Berechnung des Versors **R** bei Vorgabe der Drehachse **n** und des Drehwinkels , Lösung des Eigenwertproblems |
| Beispiel 2-3 | kapitel_02_b | Proc_Calc_03  (save) | Der Epsilon-Tensor, Berechnung von **n**×**A** und **A**×**n**. **n**: Vektor, **A:** Matrix. Drehung eines Rechtecks und Animation der Drehbewegung |
| Beispiel 2-4 | kapitel_02_b | Proc_Calc_04  (save) | Berechnung des Drehvektors **n** und des Drehwinkels  eines Versors **R** |
| Beispiel 2-5 | kapitel_02_b | Proc_Calc_05 | Berechnung der Umklappungsmatrix **** |
| Proc_Calc_06 | Berechnung der Spiegelungsmatrix **Q** |
| Beispiel 2-6 | kapitel_02_b | - | Drehung eines Rechtecks um die 3-Achse mittels zweier Umklappungen |
| Beispiel 2-7 | kapitel_02_b | - | Drehungen eines Rechtecks mit einem Drehwinkel von je 90° um die 1- und 2-Achse, umgekehrte Drehreihenfolge |
| Beispiel 2-8 | kapitel_02_c | Proc_Calc_07 | Komponententransformation für Vektoren |
| Beispiel 2-9 | kapitel_02_c | Proc_Calc_08 | Komponententransformation für Tensoren |
| Beispiel 2-10 | kapitel_02_d | Proc_Calc_09  (save) | Berechnung der Kardandrehmatrix  **T**K = **T**() **T**() **T**() bei Vorgabe der Kardanwinkel () |
| Beispiel 2-11 | kapitel_02_d | Proc_Calc_10  (save) | Berechnung der Kardanwinkel () aus der Drehmatrix **T**K |
| Beispiel 2-12 | kapitel_02_e | Proc_Calc_11  (save) | Berechnung der Eulerdrehmatrix  **T**E = **T**() **T**() **T**() bei Vorgabe der Eulerwinkel () |
| Beispiel 2-13 | kapitel_02_e | Proc_Calc_12  (save) | Berechnung der Eulerwinkel () aus der Drehmatrix **T**E |
| Beispiel 2-14 | kapitel_02_f | Proc_Calc_13 | Homogene Koordinaten, Translation und Rotation eines Quaders |
|  | kapitel_02_g | - | Geschwindigkeit und Beschleunigung des starren Körpers in Kardanwinkeln |
|  | kapitel_02_h | - | Geschwindigkeit und Beschleunigung des starren Körpers in Eulerwinkeln |

| **Beispiel** | **Arbeitsblatt** | **Prozedur** | **Aufgabe** |
| --- | --- | --- | --- |
| Beispiel 2-16 | kapitel_02_i | - | Ebenes Getriebe einer Viergelenkkette |
| Beispiel 2-18 | kapitel_02_j | Proc_Calc_14 | Fahrgeschäft, Relativbewegung |
| Beispiel 3-2 | kapitel_03_a | - | Der schiefe Wurf ohne Luftwiderstand, Animation des schiefen Wurfs |
| Beispiel 3-3 | kapitel_03_b | Proc_Calc_15 | Berechnung der Keplerbahn eines Planeten im Kraftfeld der Sonne |
| Proc_Calc_16 | Lösung der Keplerschen Zeitgleichung |
| Beispiel 3-4 | kapitel_03_c | Proc_Calc_17 | Senkrechtstart einer einstufigen Rakete |
| Beispiel 3-6 | kapitel_03_c | Proc_Calc_17 | Senkrechtstart einer zweistufigen Rakete |
| Beispiel 3-7 |  | - | Drehung eines starren Körpers um eine raumfeste Achse |
| Beispiel 3-8 | kapitel_03_d |  | Welle mit Rotor, Unwuchtwirkung |
| Beispiel 3-9 | kapitel_03_d |  | Biegekritische Drehzahl einer geraden elastischen Welle |
| Beispiel 3-10 | - | - | Transformation von Massenträgheitsmomenten gegenüber einer gedrehten Basis |
| Beispiel 3-11 | kapitel_03_e | - | Hauptachsentransformation der Matrix des Massenträgheitsmomententensors |
| Beispiel 3-12 Beispiel 3-13 Beispiel 3-14 | kapitel_03_f | Proc_Calc_18 (save) | Massenträgheitsmomente eines Quaders sowie regelmäßiger homogener Rotationskörper (Torus, gerader Kreiszylinder, Hohlzylinder, gerader Kreiskegel, Kegelstumpf, Kugel, Halbkugel, Spielkreisel), Hauptachsentransformation |
| Beispiel 3-15  Beispiel 3-16 | kapitel_03_g | Proc_Calc_19  (save) | Massenträgheitsmomente eines aus Tetraedern zusammengesetzten Polyeders, Zusatzbeispiel einer regulären Pyramide |
| Beispiel 3-17 | kapitel_03_h |  | Reines Rollen einer inhomogenen Scheibe, das Rollpendel |
| Beispiel 3-18  Beispiel 3-19 | kapitel_03_i |  | Das mathematische und das physische Pendel |
| Beispiel 3-21 | kapitel_03_j | Proc_Calc_20  (save) | Der *unsymmetrische* Kreisel unter Momentenbelastung (Eulerwinkel), Animation der Kreiselbewegung |
| Beispiel 3-22 | kapitel_03_k | Proc_Calc_21  (save) | Der *unsymmetrische* Kreisel unter Momentenbelastung (Kardanwinkel), Animation der Kreiselbewegung |
| Beispiel 3-23 | kapitel_03_l | - | Der *unsymmetrische schwere* Kreisel (Eulerwinkel), Animation der Kreiselbewegung |
| Beispiel 3-24 | kapitel_03_m | Proc_Calc_22  (save) | Der *symmetrische schwere* Kreisel (Eulerwinkel), Animation der Kreiselbewegung |
| Beispiel 4-4 | kapitel_04_a | - | Der schiefe Wurf mit Luftwiderstand (Turbulente Dämpfung) |
| Beispiel 4-5 | kapitel_04_b | - | Fallschirmsprung mit Luftwiderstand (Turbulente Dämpfung) |
| Beispiel 4-6 | kapitel_04_c | - | Der schiefe Wurf mit Widerstand (Viskose Reibung) |

| **Beispiel** | **Arbeitsblatt** | **Prozedur** | **Aufgabe** |
| --- | --- | --- | --- |
| Beispiel 5-1 | kapitel_05_a | - | Die rückprallende Kugel, Animation des Bewegungsvorganges |
| Beispiel 5-1  Beispiel 5-2  Beispiel 5-3 | kapitel_05_b | Proc_Calc_23 | Der zentrale Zusammenstoß zweier fester Körper |
| Beispiel 5-5 | kapitel_05_c | Proc_Calc_24 | Der schiefe exzentrische Zusammenstoß zweier fester Körper mit glatter Oberfläche |
| Beispiel 5-6  Beispiel 5-7 | kapitel_05_d | Proc_Calc_25 | Der schiefe exzentrische Zusammenstoß zweier fester Körper mit rauer Oberfläche |
| Beispiel 5-8 | kapitel_05_e | Proc_Calc_26 | Das ballistische Pendel |
| Beispiel 5-9  Beispiel 5-10 | kapitel_05_f | - | Stoßbelastungen an Trägern und Stützen |
| Beispiel 6-1  Beispiel 6-2 | kapitel_06_a |  | Die Lagrangeschen Bewegungsgleichungen, Schwinger mit zwei Freiheitsgraden, das Doppelpendel mit Animation der Bewegung |
| Beispiel 7-1 | kapitel_07_a |  | Schwingungsversuch an einer Probe aus viskoelastischem Material (Standard-Modell) |
| Zusatzbeispiel | kapitel_07_b |  | Schwingungsversuch an einer Probe aus viskoelastischem Material (Kelvin-Modell) sowie Kriechversuch am Kelvin-Modell |
| Beispiel 7-2 | kapitel_07_c | Proc_Calc_27 | Freie Bewegungen des viskos gedämpften Einmassenschwingers |
| - | kapitel_07_d |  | Erzwungene Bewegungen des ungedämpften Einmassenschwingers |
| Beispiel 7-3  Beispiel 7-4 | kapitel_07_e |  | Erzwungene Bewegungen des viskos gedämpften Einmassenschwingers |
| Beispiel 7-5 | kapitel_07_f | Proc_Calc_28 | Freie ungedämpfte Schwingungen für Systeme mit endlich vielen Freiheitsgraden |
| Beispiel 7-6 | kapitel_07_g | Proc_Calc_29 | Torsionskritische Drehzahlen |
| Beispiel 7-7 | kapitel_07_h | Proc_Calc_30 | Berechnung der Wurzel aus einer symmetrischen Matrix (Proc_Calc_30).  Der viskos gedämpfte Zweimassenschwinger |
| Zusatzbeispiel | kapitel_07_i | Proc_Calc_31 | Freie viskos gedämpfte Schwingungenmit allgemein *n* Freiheitsgraden |
